# Supplementary material for: Direct observation of the intermediate radical in the photodissociation of 1,3-cyclohexane dinitrite
Source: Royal Society of Chemistry journal article supplement (doi:10.1039/c9cp03895g), 2019-01-01

## Supporting Information

### Direct observation of the intermediate radical in the photodissociation of 1,3-cyclohexane dinitrite

Tai Qin, Junfei Xue, Dayujia Huo, Lily Zu\*

College of Chemistry, Beijing Normal University, Beijing, 100875, P. R. China

## Table of content

*Fig S1 IR spectra of cis 1,3-cyclohexane dinitrite and trans 1,3-cyclohexane dinitrite.*

*Fig S2 UV absorption spectra of cis 1,3-cyclohexane dinitrite and trans 1,3-cyclohexane dinitrite.*

*Fig S3 (a) LIF spectra obtained by 355 nm laser photolysis of 1,3-cyclohexane dinitrite (cis-trans mixture), and (b) LIF spectra of 3-methyl substituted cyclohexoxy radical.*

*Table S1 Assignment of the LIF spectrum obtained by photodissociation of trans 1,3-cyclohexane dinitrite.*

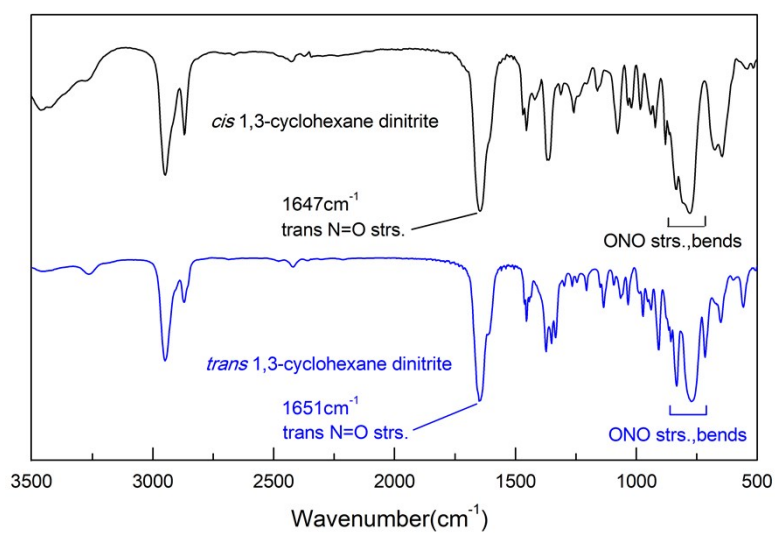

**Fig. S1** IR spectra of *cis* 1,3-cyclohexane dinitrite and *trans* 1,3-cyclohexane dinitrite.

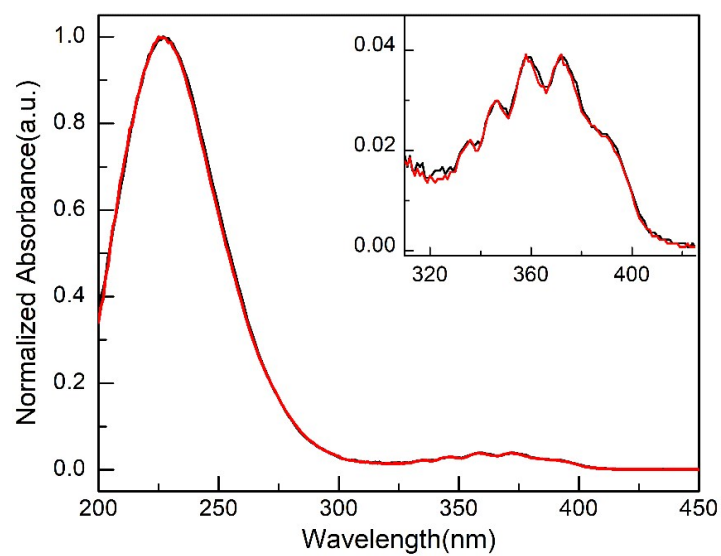

**Fig. S2** UV absorption spectra of *cis* 1,3-cyclohexane dinitrite (black) and *trans* 1,3-cyclohexane dinitrite (red).

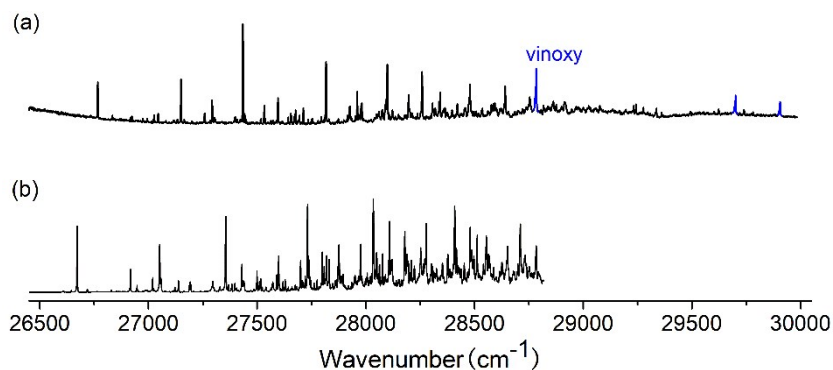

**Fig. S3** (a) LIF spectra obtained by 355 nm laser photolysis of 1,3-cyclohexane dinitrite (*cis-trans* mixture), and (b) LIF spectra of 3-methyl substituted cyclohexoxy radical.

**Table S1** Assignment of the LIF spectrum obtained by photodissociation of *trans* 1,3-cyclohexane dinitrite.

| Band | Experimental <sup>a</sup> | Predicted <sup>b</sup> | Assignment       |
|------|---------------------------|------------------------|------------------|
| a    | 0                         |                        | $\nu_{00}^{D-X}$ |
| b    | 139                       | 115                    | $\nu_{53}$       |
| c    | 613                       | 544                    | $\nu_{42}$       |
| d    | 752                       | 746                    | $\nu_{40}$       |
| e    | 819                       | 809                    | $\nu_{39}$       |
| f    | 959                       | 948                    | $\nu_{34}$       |

<sup>a</sup> Observed band maxima (cm<sup>-1</sup>) relative to  $\nu_{00}^{D-X}$  at 26838 cm<sup>-1</sup>.

<sup>b</sup> Scaled CASSCF(9,7)/6-311++G(d,p) frequencies (scale factor 0.95) for the fundamentals, and sum of the fundamental frequencies (cm<sup>-1</sup>) for combination and overtone bands.

*trans* 3-nitrosooxy cyclohexoxy radical  
chair (e,a) conformer

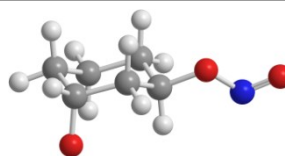

Supplement: c9cp03895g1.pdf [file c9cp03895g1.pdf]
